# Supplementary material
Source: bioRxiv or medRxiv preprint supplement (https://www.biorxiv.org/content/biorxiv/early/2019/08/06/726737.1/DC1/embed/media-1.pdf)
Supplement: Supplementary file [file media-1.pdf]

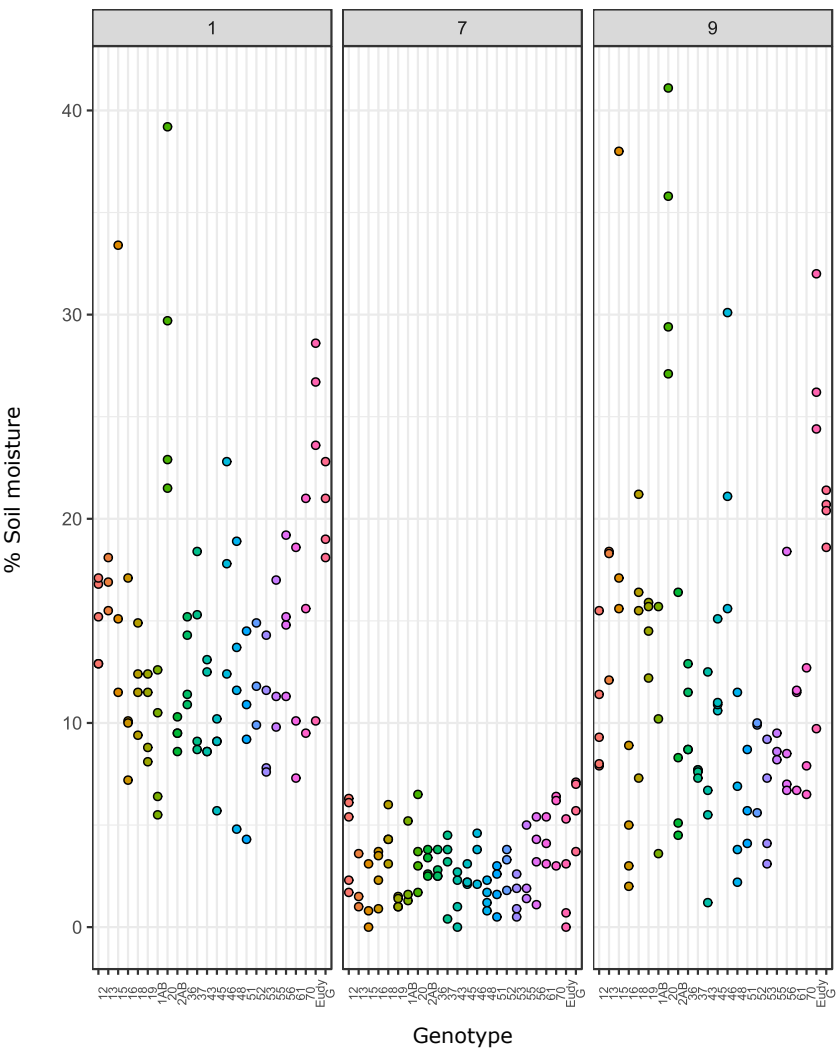

**Supplemental Figure 1** - Soil moisture measurements across replicate plants of each genotype. Showing only *Y. gloriosa* individuals measured as a part of this study.
